# Supplementary material for: Two Rhabdoviruses, One Novel, Isolated from Armigeres subalbatus in China
Source: MDPI journal article supplement (doi:10.3390/pathogens11060624), 2022-05-27
Supplement: s1 [file s1]

**Table S1.** Summary of mosquito specimens collected from June to August 2019 in Wuxiang County, Shanxi Province.

| The collection site | <i>Anopheles sinensis</i> | <i>Armigeres subalbatus</i> | <i>Aedimorphus vexans</i> | <i>Culex pipiens pallens</i> | The total |
|---------------------|---------------------------|-----------------------------|---------------------------|------------------------------|-----------|
| Collection site 1   | 326                       | 248                         | 2                         | 2                            | 578       |
| Collection site 2   | 0                         | 17                          | 7                         | 0                            | 24        |
| Collection site 3   | 14                        | 92                          | 28                        | 43                           | 177       |
| Collection site 4   | 0                         | 3                           | 0                         | 0                            | 3         |
| The total           | 340(43.48%)               | 360(46.04%)                 | 37(4.73%)                 | 45(5.75%)                    | 782       |
| The pools           | 7                         | 7                           | 1                         | 1                            | 16        |

Note:Collection site 1 was a mule pen, collection site 2 comprised mule and chicken pens, collection site 3 comprised a mule pen and dog kennel, from where SX1916 isolate was obtained, and collection site 4 was a chicken pen.

**Table S2.** Viral gene amplification primers used for initial virus identification in this study.

| primer                      | The amplified segment | Sequence of primers(5'-3')              | The length of amplification (bp) |
|-----------------------------|-----------------------|-----------------------------------------|----------------------------------|
| Flavivirus                  |                       |                                         |                                  |
| FU1                         | NS5                   | TAC AAC ATG ATG GGA AAG AGA GAG AA      | 266bp                            |
| cFD2                        |                       | GTG TCC CAG CCG GCG GTG TCA TCA GC      |                                  |
| Alphavirus                  |                       |                                         |                                  |
| M2W(+)                      | NSP1                  | YAG AGC DTT TTC GCA YST RGC HW          | 434bp                            |
| cM3W                        |                       | ACA TRA ANK GNG TNG TRT CRA ANC CDA YCC |                                  |
| M2W2(+)                     |                       | TGY CCN VTG MDN WSY VCN GAR GAY CC      | 310bp                            |
| Bunyavirus                  |                       |                                         |                                  |
| BUP                         | S                     | ATG ACT GAG TTG GAG TTT GAT GTC GC      | 251bp                            |
| BDW                         |                       | TGT TCC TGT TGC CAG GAA AAT             |                                  |
| Banna virus                 |                       |                                         |                                  |
| BAV-12-854-S                | 12S                   | AAA TTG ATA GYG YTT GCG TAA GAC         | 850bp                            |
| BAV-12-B2-R                 |                       | GTT CTA AAT TGG ATA CGG CGT GC          |                                  |
| OYA virus                   |                       |                                         |                                  |
| OYA-11F                     | NS                    | GGT TAA TAA CCA TTT TCC CCA             | 310bp                            |
| OYA-2R                      |                       | ACC TTC CTC ATG AAG TTG ACA             |                                  |
| Tibet orbivirus             |                       |                                         |                                  |
| 6-4-2F                      | 4s                    | CGA CAG ACC AAA AGA TAT                 | 848bp                            |
| 6-4-2R                      |                       | TCA ACA CGT AAT CCA ATA                 |                                  |
| Japanese encephalitis virus |                       |                                         |                                  |
| JE-955F                     | E                     | TGYTGG TCG CTC CGG CTT A                | 1581bp                           |
| JE-2536R                    |                       | AAG ATG CCA CTT CCA CAY CTC             |                                  |
| Densovirus                  |                       |                                         |                                  |
| DNV-F                       | NS1                   | AACCGTTGGTGACCTCTACCCAC                 | 1105bp                           |
| DNV-R                       |                       | GATTTTCCCATTTGCTGTGCCGTTG               |                                  |
| Totivirus                   |                       |                                         |                                  |
| Toti2-947F                  |                       | GCAATGGAGAACAAATTCACG                   | 825bp                            |
| Toti2-1771R                 |                       | CTGGTGTGCTTGTTTCTGTTTC                  |                                  |

**Table S3:** Taxonomy annotation of all virus contigs.

| No.     | Length | Accession      | Blastx                                                                | Identity | E value  | Order           | Family           | Subfamily          | Genus         | Species                                   |
|---------|--------|----------------|-----------------------------------------------------------------------|----------|----------|-----------------|------------------|--------------------|---------------|-------------------------------------------|
| Contig1 | 522    | YP_009094378.1 | YP_009094378.1 N protein<br>[Arboretum almendravirus]                 | 76.2     | 2.90E-26 | Mononegavirales | Rhabdoviridae    | Alpharhabdovirinae | Almendravirus | Arboretum almendravirus                   |
| Contig2 | 525    | YP_009094379.1 | YP_009094379.1 P protein<br>[Arboretum almendravirus]                 | 89.4     | 4.80E-13 | Mononegavirales | Rhabdoviridae    | Alpharhabdovirinae | Almendravirus | Arboretum almendravirus                   |
| Contig3 | 11704  | YP_009094383.1 | YP_009094383.1 L protein<br>[Arboretum almendravirus]                 | 90.6     | 0        | Mononegavirales | Rhabdoviridae    | Alpharhabdovirinae | Almendravirus | Arboretum almendravirus                   |
| Contig4 | 423    | QEM39328.1     | QEM39328.1 NP, partial<br>[Guadeloupe mosquito quaranja-like virus 3] | 26.8     | 6.60E-05 | Articulavirales | Orthomyxoviridae | NA                 | Quaranjavirus | Guadeloupe mosquito quaranja-like virus 3 |
| Contig5 | 446    | YP_009094383.1 | YP_009094383.1 L protein<br>[Arboretum almendravirus]                 | 95.7     | 3.00E-16 | Mononegavirales | Rhabdoviridae    | Alpharhabdovirinae | Almendravirus | Arboretum almendravirus                   |
| Contig6 | 937    | YP_009094378.1 | YP_009094378.1 N protein<br>[Arboretum almendravirus]                 | 80.4     | 2.50E-12 | Mononegavirales | Rhabdoviridae    | Alpharhabdovirinae | Almendravirus | Arboretum almendravirus                   |
| Contig7 | 9726   | YP_009094394.1 | YP_009094394.1 L protein<br>[Puerto Almendras virus]                  | 47.1     | 0        | Mononegavirales | Rhabdoviridae    | Alpharhabdovirinae | Almendravirus | Puerto Almendras almendravirus            |
| Contig8 | 463    | YP_009094378.1 | YP_009094378.1 N protein<br>[Arboretum almendravirus]                 | 90.3     | 4.90E-38 | Mononegavirales | Rhabdoviridae    | Alpharhabdovirinae | Almendravirus | Arboretum almendravirus                   |
| Contig9 | 474    | ANW72245.1     | ANW72245.1 putative glycoprotein, partial [Guato virus]               | 98.1     | 2.60E-82 | NA              | NA               | NA                 | NA            | Guato virus                               |

**Table S4.** Shanxi *Armigeres subalbatus* rhabdovirus (SXARV) and Shanxi Arboretum virus (SXABTV) genome nucleotide sequence amplification primers used in this study.

| primer      | The amplified segment | Sequence of primers(5'-3') | The length of amplification (bp) |
|-------------|-----------------------|----------------------------|----------------------------------|
| SXABTV      |                       |                            |                                  |
| AB1-1F      | N                     | CCCCTTATAAAGCACACGCC       | 437bp                            |
| AB1-437R    |                       | ACATTGATGGATCATCGGGC       |                                  |
| AB2-121F    | N                     | TGCCCTAGTTCTCATGTTCCC      | 977bp                            |
| AB2-1097R   |                       | ACTCTGCATCTGTCATCGAGAA     |                                  |
| AB3-849F    | N、P                   | CCACATTGTTGATGGGCGAA       | 1205bp                           |
| AB3-2053R   |                       | TGATCTATGGCTAGAGCTTGGT     |                                  |
| AB4-1883F   | P、M                   | GACGAGATCATGACTCCCAACA     | 1171bp                           |
| AB4-3053R   |                       | CGAACGAGCCTACTTCTGGG       |                                  |
| AB5-2901F   | M、G                   | TCCTGTTGACGAAACGTGGA       | 1209bp                           |
| AB5-4109R   |                       | TGGCATTCTTAAGGGAGGGT       |                                  |
| AB6-3882F   | G                     | ACTGCCCCGAAAGTTGAGGAG      | 1154bp                           |
| AB6-5035R   |                       | AGATACCGTAGACCTGTCGT       |                                  |
| AB7-4705F   | U1、L                  | AACCAAGGGTCACGAATTGGA      | 1415bp                           |
| AB7-6119R   |                       | ATCAGCGATCTTTCCCACCA       |                                  |
| AB8-5908F   | L                     | GGAGGTACTCTAAAGACTTGCCTG   | 1273bp                           |
| AB8-7180R   |                       | ATTCTTTCAAAGCCCCCTGG       |                                  |
| AB9-6997F   | L                     | AAGCTGTCGGACCGGTTTTT       | 1155bp                           |
| AB9-8151R   |                       | ATCGAGGGAAGCAGGGTTTT       |                                  |
| AB10-7811F  | L                     | GTTCCCGGATCCTATAACCGA      | 1145bp                           |
| AB10-8955R  |                       | GACTTGCACCTATGGTTTCTGC     |                                  |
| AB11-8763F  | L                     | AAGAGACGCTCAGGAAGTGC       | 985bp                            |
| AB11-9747R  |                       | TCCTGATACGTGATGTGTTTCGG    |                                  |
| AB12-9516F  | L                     | CCACCAGAATATCTCCGAGT       | 1289bp                           |
| AB12-10804R |                       | TCACGAAGAGACGGTGGAATC      |                                  |
| AB13-10700F | L                     | AAGCTGTCGGACCGGTTTTT       | 900                              |
| AB13-11600R |                       | ATCGAGGGAAGCAGGGTTTT       |                                  |

---

|            |        |                           |        |
|------------|--------|---------------------------|--------|
| SXARV      |        |                           |        |
| AR1-1F     | N      | AATGGGTTTAATTACATGAGTC    | 425bp  |
| AR1-425R   |        | TTGACTCTCCCTTTAGCCCAT     |        |
| AR2-303F   | N、P    | TGCCATGGGTAGCGTAGAAG      | 744bp  |
| AR2-1046R  |        | CCTGGTTTGTCAACTCCGGT      |        |
| AR3-911F   | P、M    | CCGGATGAAGTTTGGTGCC       | 855bp  |
| AR3-1765R  |        | GCTTCGATCAAGTTGCACGG      |        |
| AR4-1626F  | G      | ACGGGCCAGAGTTTAAAGGAT     | 1031bp |
| AR4-2656R  |        | AGTGGGGTGCAGCTTCCTAA      |        |
| AR5-2329F  | G、U1、L | TGTCAATACCATGTATGTAGCGGA  | 1405bp |
| AR5-3733R  |        | AGTGTGAGCAGTAATAAACTCTTCT |        |
| AR6-3513F  | L      | TCAGCTTGAACCCCCGATT       | 1221bp |
| AR6-4733R  |        | CCCATCTACCCTCTAATTGGTCA   |        |
| AR7-4597F  | L      | AATGAGACACTTCCACACAACT    | 849bp  |
| AR7-5445R  |        | ACTAATGACCACCCCTTTTGTCT   |        |
| AR8-5242F  | L      | AGATGAGGCAGTAGGTCCAGT     | 948bp  |
| AR8-6189R  |        | TTGTTCAATGAAGTCGCAGTGA    |        |
| AR9-6046F  | L      | AAGGCGATTTCCAGACCCAA      | 992bp  |
| AR9-7037R  |        | ATCTGTGTTGCGCTGTACCA      |        |
| AR10-6831F | L      | GTGCATTACAGCCATGGGAAA     | 1284bp |
| AR10-8114R |        | GCAGTTCTTGAGAGCTGACTTG    |        |
| AR11-7803F | L      | CCTCCTTGGCAGTTAGTGGA      | 1186bp |
| AR11-8988R |        | GCCCTAGCAAATTCCTCTACATC   |        |
| AR12-8707F | L      | TGCTGCTAACTTCATCAAAGGC    | 1018bp |
| AR12-9724R |        | CAGACGTGTGCTCTTCCGAT      |        |

---

**Table S5.** Virus strains used in virus molecular genetic evolution analysis in this study.

| No. | Genus                  | Virus                                   | Year | Country                       | Host                                      | Isolate      | Genbank number |
|-----|------------------------|-----------------------------------------|------|-------------------------------|-------------------------------------------|--------------|----------------|
| 1   |                        | Shanxi Arboretum virus                  | 2019 | China                         | Armigeres subalbatus                      | SXABTV1916-1 | MW890015       |
| 2   |                        | Shanxi Armigeres subalbatus rhabdovirus | 2019 | China                         | Armigeres subalbatus                      | SXARV1916-2  | MW890016       |
| 3   |                        | Arboretum virus                         | 2009 | Peru                          | Psorophora albigena mosquitoes            | Lo-121       | NC_025393.1    |
| 4   |                        | Balsa virus                             | 2013 | Colombia                      | Psorophora albigena                       | CoB 76       | NC_039200.1    |
| 5   |                        | Balsa virus                             | 2013 | Colombia                      | Psorophora albigena                       | CoB 84       | KX228199       |
| 6   |                        | Coot Bay virus                          | 2013 | USA                           | Anopheles quadrimaculatus                 | EVG5-53      | NC_031957.1    |
| 7   | Almendravirus          | Menghai rhabdovirus                     | 2010 | China                         | Aedes albopictus                          | Menghai      | NC_040602.1    |
| 8   |                        | Menghai rhabdovirus                     | 2018 | Japan                         | Aedes albopictus cultured cell line C6/36 | kunoichi     | LC270812       |
| 9   |                        | Menghai rhabdovirus                     | 2018 | China                         | Midges                                    | GD18003      | MT240824.1     |
| 10  |                        | Menghai rhabdovirus                     | 2018 | China                         | Midges                                    | GD18004      | MT240825.1     |
| 11  |                        | Menghai rhabdovirus                     | 2018 | China                         | Midges                                    | GD18005      | MT240826.1     |
| 12  |                        | Menghai rhabdovirus                     | 2018 | China                         | Midges                                    | GD18008      | MT240827.1     |
| 13  |                        | Menghai rhabdovirus                     | 2018 | China                         | Midges                                    | GD18010      | MT240828.1     |
| 14  |                        | Puerto Almendras virus                  | 2009 | Peru                          | Ochlerotatus fulvus                       | LO-39        | NC_025395.1    |
| 15  |                        | Rio Chico virus                         | 2013 | Panama                        | Anopheles triannulatus                    | GAM 195      | NC_031958.1    |
| 16  | Alphanemrhavirus       | Xingshan nematode virus                 | 2014 | China                         | Spirurian nematodes                       | XSNXC32924   | NC_033701.1    |
| 17  | Alphanucleorhabdovirus | Potato yellow dwarf virus               | 2008 | USA                           | /                                         | SYDV         | NC_016136.1    |
| 18  | Arurhavirus            | Aruac virus                             | 1955 | Trinidad and Tobago: Trinidad | Trichoprosopon theobaldi                  | TRVL9223     | KM204987.1     |
| 19  | Barhavirus             | Bahia grande virus                      | 1974 | USA                           | Ochlerotatus sollicitans                  | TB4-1054     | KM205018.1     |
| 20  | Betanucleorhabdovirus  | Sonchus yellow net virus                | 1992 | /                             | Nicotiana edwardsonii                     | /            | L32603.1       |
| 21  | Caligrhavirus          | Lepeophtheirus salmonis rhabdovirus     | 2013 | Norway                        | Lepeophtheirus salmonis                   | LSRV-No127   | KJ958536.1     |
| 22  | Curiovirus             | Curionopolis virus                      | 1985 | Brazil                        | Culicoides sp.                            | BeAr440009   | NC_039201.1    |

|    |                        |                                                |           |               |                                                               |                         |             |
|----|------------------------|------------------------------------------------|-----------|---------------|---------------------------------------------------------------|-------------------------|-------------|
| 23 | Cytorhabdovirus        | Lettuce necrotic yellows virus                 | /         | Australia     | Allium sativum (garlic)                                       | 318                     | NC_007642.1 |
| 24 | Dichorhavirus          | Citrus chlorotic spot virus                    | 2017      | Brazil        | Talipariti tiliaceum (L.) Fryxell (syn. Hibiscus tiliaceus L. | Trs3                    | MG970599.1  |
| 25 | Ephemerovirus          | Bovine ephemeral fever virus                   | 1968      | /             | Cow                                                           | BB7721                  | NC_002526.1 |
| 26 | Gammanucleorhabdovirus | Maize fine streak virus                        | 2004      | USA           | /                                                             | /                       | NC_005974.1 |
| 27 | Hapavirus              | Flanders virus                                 | 1961      | USA           | Culiseta melanura                                             | 61-7484                 | NC_039202.1 |
| 28 | Ledantavirus           | Le Dantec virus                                | 1965      | Senegal       | Homo sapiens                                                  | DakHD763                | NC_034443.1 |
| 29 | Lostrhavirus           | Lone star tick rhabdovirus                     | 2009      | USA           | Amblyomma americanum                                          | TickAa42                | KU127239.1  |
| 30 | Lyssavirus             | Rabies virus                                   | /         | /             | /                                                             | /                       | NC_001542.1 |
| 31 | Mousrhavirus           | Moussa virus                                   | 2004      | Cote d'Ivoire | Culex decens                                                  | C23                     | NC_025359.1 |
| 32 | Novirhabdovirus        | Infectious hematopoietic necrosis virus (IHNV) |           |               | Oncorhynchus tshawytscha                                      | WRAC                    | NC_001652.1 |
| 33 | Ohlsrhavirus           | Ohlsdorf virus                                 | 2012      | Germany       | Ochlerotatus cantans                                          | Germany/2012/Oc.cantans | KY768856.1  |
| 34 | Perhabdovirus          | Perch rhabdovirus                              | 1981      | France        | Perca fluviatilis                                             | PRV                     | NC_020803.1 |
| 35 | Sawgrhavirus           | Sawgrass virus                                 | 1964      | USA           | Dermacentor variabilis                                        | 64A-1247                | KM205013.1  |
| 36 | Sigmavirus             | Drosophila melanogaster sigmavirus             | uncertain | France        | Drosophila melanogaster                                       | HAP23                   | NC_038281.1 |
| 37 | Sprivivirus            | spring viremia of carp virus                   | /         | /             | Cyprinus carpio                                               | ATCC VR-1390            | NC_002803.1 |
| 38 | Sripuvirus             | Niakha virus                                   | 1992      | Senegal       | Phlebotomus duboscq and Sergentomyia sp.                      | DakArD 88909            | NC_025405.1 |
| 39 | Sunrhavirus            | Sunguru virus                                  | 2013      | Uganda        | chicken                                                       | Ug#41                   | NC_025401.1 |
| 40 | Tibrovirus             | Tibrogargan virus                              | 1976      | Australia     | Culicoides brevitarsis                                        | CS132                   | NC_020804.1 |
| 41 | Tupavirus              | Durham virus                                   |           | USA           | bird                                                          |                         | NC_038284.1 |
| 42 | Varicosavirus          | Lettuce big-vein associated virus              |           | /             | /                                                             | /                       | NC_011558.1 |
| 43 | Vesiculovirus          | Vesicular stomatitis Indiana virus             | 1998      | USA: Colorado | equine                                                        | 98COE                   | NC_038236.1 |
| 44 | Zarhavirus             | Zahedan rhabdovirus                            | 2001      | Iran          | Hyalomma anatolicum anatolicum                                | Ar Teh 157764           | NC_040664.1 |

**Note:** / indicates that no relevant information was found in the National Center for Biotechnology Information (NCBI) database.

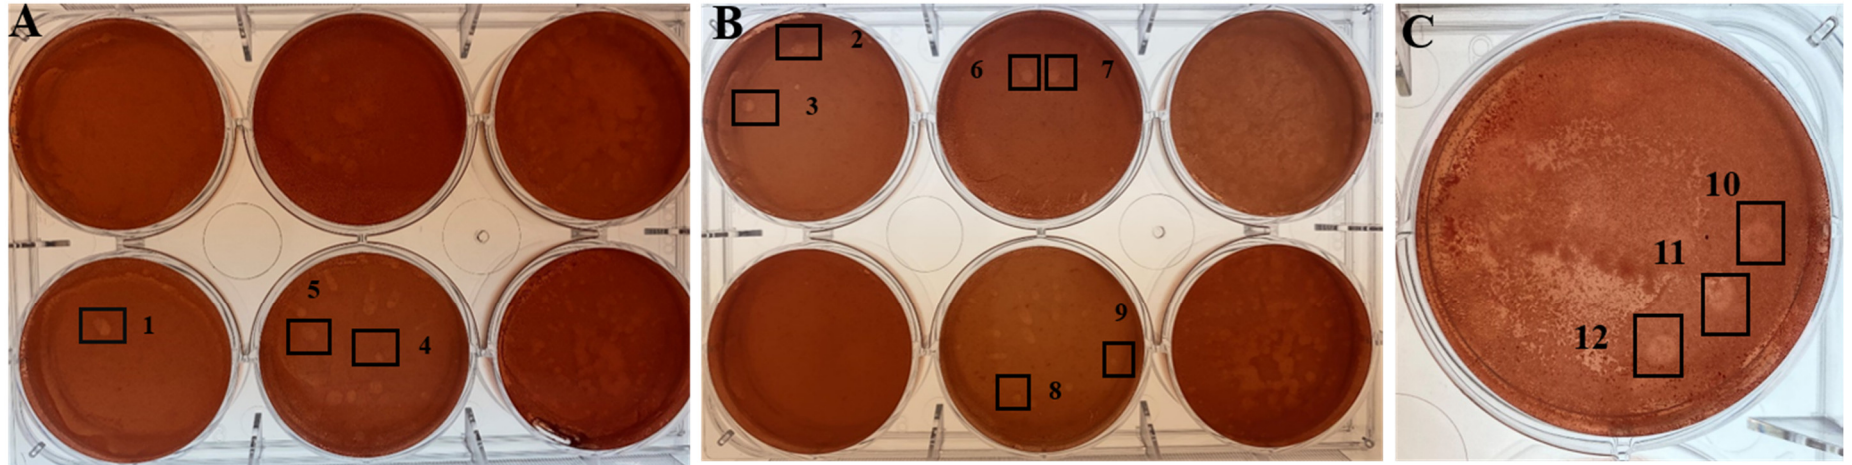

**Figure S1.** Plaque purification of the SX1916 virus isolate.

Note: A and B) Nine virus plaques were obtained in the first plaque purification assay. C) Three virus plaques were obtained in the second plaque purification assay.



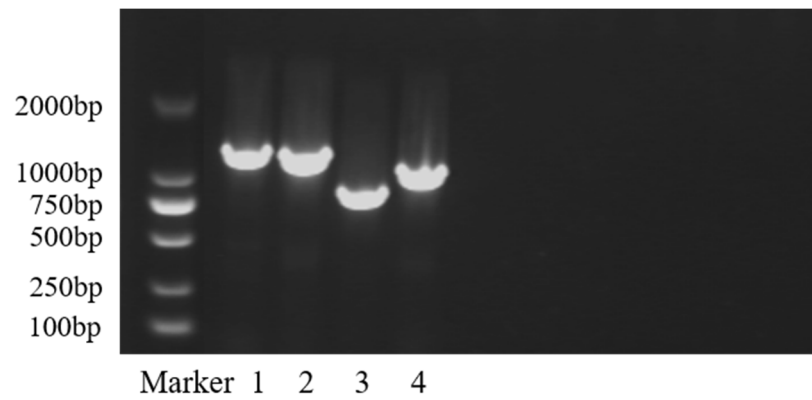

**Figure S2.** SXARV and SXABTV gene amplification in fourth-generation C6/36 cells inoculated with the SX1916 virus isolate. Note: The first and second channels in the electrophoresis diagram are positive amplification products of the SXABTV N and P genes, respectively. The third and fourth channels are positive amplification products of the SXARV P and M genes, respectively.

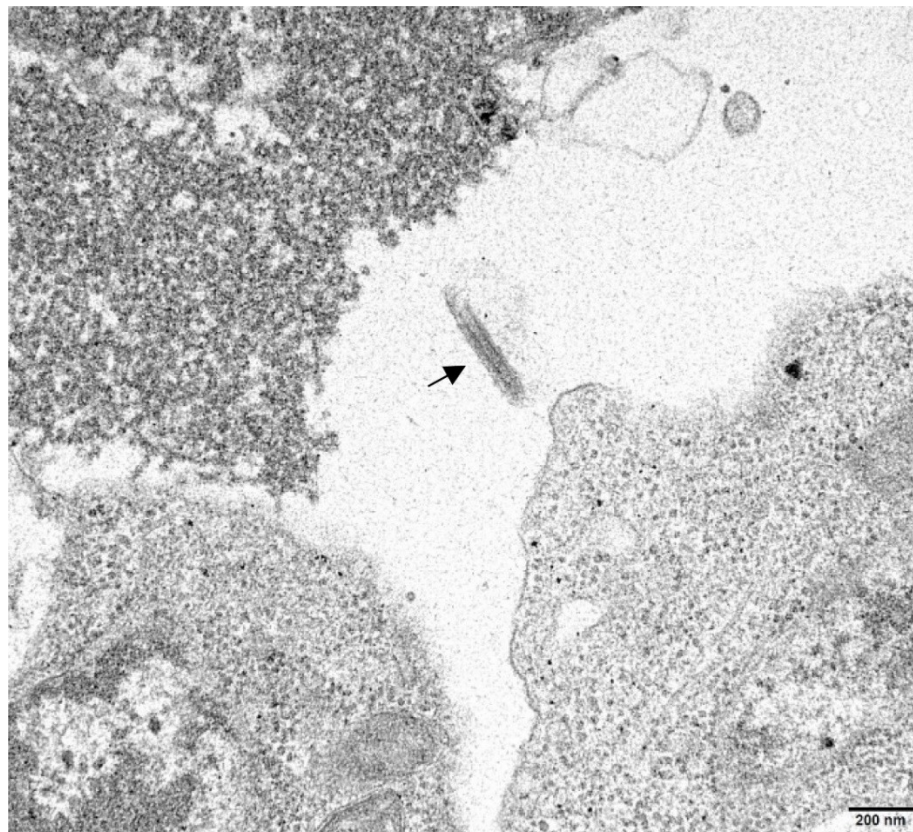

**Figure S3.** Electron microscopic morphology of SXARV.



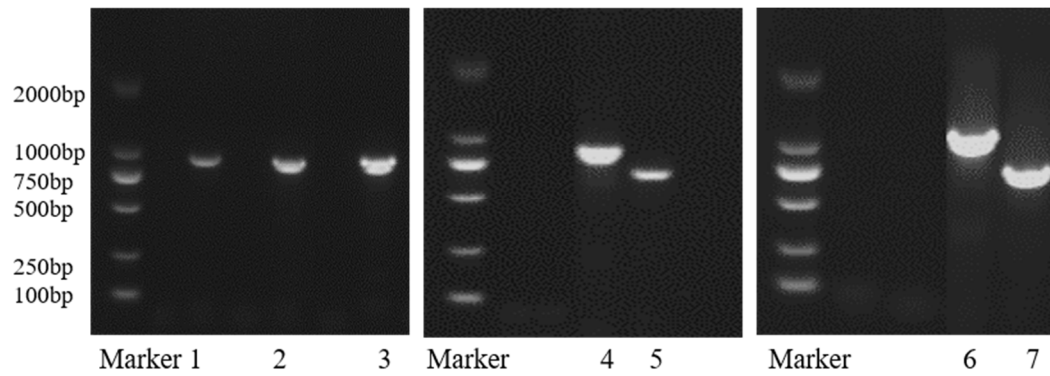

**Figure S5.** SX1916 virus(SXABTV and SXARV) and SXARV gene amplification

Note: The first channel, the second channel and the third channel in the electrophoresis diagram are positive amplification products of SXARV-infected c6/36 cells of 1-3 generations, respectively. The fourth and fifth channels were positive amplification products of SXABTV and SXARV infected second generation C6/36 cells, respectively. The sixth and seventh channels were positive amplification products of SXABTV and SXARV infected fourth generation C6/36 cells, respectively.
